# Supplementary material
Source: PubMed Central journal article supplement (PMC3391583)
Supplement: NIHMS384602-supplement-Supp__Fig__1__Table_1__Table_2.pdf [file NIHMS384602-supplement-Supp__Fig__1__Table_1__Table_2.pdf]

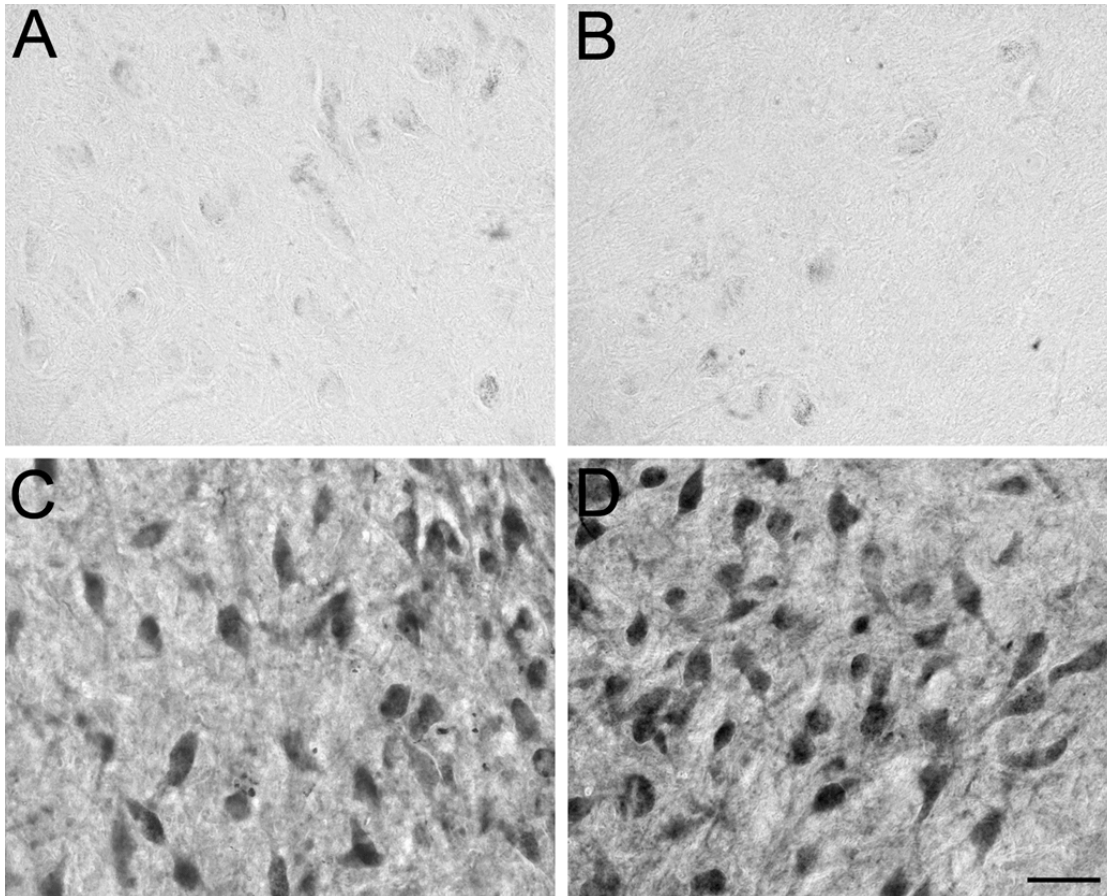

**Fig. S1.** The 3NT primary antibody is specific for nitrated tyrosine. **A:** Primary Delete: When the primary antibody was omitted during the staining protocol no staining was present. **B:** 3NT Preadsorption: When the 3NT primary antibody was preadsorbed with 12 mM of 3NT prior to use, no immunoreactivity was seen. **C:** L-tyrosine Preadsorption: When the 3NT primary antibody was preadsorbed with 12 mM of L-tyrosine the normal pattern of 3NT immunoreactivity was seen. **D:** Normal 3NT Primary Antibody: When the normal 3NT antibody was used in the protocol numerous nigral neurons were labeled with 3NT immunoreactivity. Together, these results show the 3NT primary antibody is specific for 3NT. Scale bar = 50  $\mu$ m in D (applies to A-D).

Supplemental Table 1. Estimated 3NT+ cell number, estimated 3NT+ cell volume ( $\mu\text{m}^3$ ), optical density of 3NT-ir, DAT-ir, VMAT-ir, and DAT/VMAT ratios in the vtSN, dtSN, and VTA of young, middle-age, and old-age monkeys

|       |                                      | Age Group     |               |               |
|-------|--------------------------------------|---------------|---------------|---------------|
|       |                                      | Young         | Middle-age    | Old-age       |
| vtSN  | 3NT+ Cell #                          | 89675 ± 5345  | 110446 ± 6222 | 107622 ± 7145 |
|       | 3NT+ Cell Volume ( $\mu\text{m}^3$ ) | 8535 ± 518    | 8226 ± 558    | 9401 ± 567    |
|       | DAT Intensity                        | 1060 ± 158    | 971 ± 104     | 741 ± 101     |
|       | VMAT Intensity                       | 2059 ± 158    | 2081 ± 93     | 2186 ± 49     |
|       | DAT/VMAT                             | 0.519 ± 0.032 | 0.466 ± 0.042 | 0.343 ± 0.053 |
|       | 3NT Intensity                        | 790 ± 111     | 765 ± 183     | 1656 ± 306    |
| ----- |                                      |               |               |               |
| dtSN  | 3NT+ Cell #                          | 4268 ± 205    | 5152 ± 520    | 4716 ± 590    |
|       | 3NT+ Cell Volume ( $\mu\text{m}^3$ ) | 8041 ± 1074   | 7869 ± 609    | 9018 ± 1079   |
|       | DAT Intensity                        | 645 ± 125     | 746 ± 70      | 407 ± 41      |
|       | VMAT Intensity                       | 1566 ± 189    | 1758 ± 70     | 1592 ± 57     |
|       | DAT/VMAT                             | 0.397 ± 0.032 | 0.422 ± 0.030 | 0.256 ± 0.023 |
|       | 3NT Intensity                        | 391 ± 193     | 350 ± 92      | 609 ± 284     |
| ----- |                                      |               |               |               |
| VTA   | 3NT+ Cell #                          | 17059 ± 2220  | 18013 ± 730   | 19985 ± 2913  |
|       | 3NT+ Cell Volume ( $\mu\text{m}^3$ ) | 6156 ± 570    | 6304 ± 116    | 7664 ± 172    |
|       | DAT Intensity                        | 860 ± 155     | 837 ± 87      | 611 ± 58      |
|       | VMAT Intensity                       | 1926 ± 206    | 1919 ± 73     | 1949 ± 29     |

|               |               |               |               |
|---------------|---------------|---------------|---------------|
| DAT/VMAT      | 0.441 ± 0.043 | 0.432 ± 0.042 | 0.311 ± 0.031 |
| 3NT Intensity | 853 ± 143     | 974 ± 227     | 1587 ± 342    |

Data are presented as means ± SEM

Supplemental Table 2. DAT, VMAT, and DAT/VMAT ratios are predictors of 3NT levels in midbrain DA neurons.

| Region | Marker         | Age Group                                          |                                                     |                                                     |
|--------|----------------|----------------------------------------------------|-----------------------------------------------------|-----------------------------------------------------|
|        |                | Young                                              | Middle-age                                          | Old-age                                             |
| vtSN   | DAT            | F(1,276) = 15.75,<br><b>p &lt; 0.001, R = 0.23</b> | F(1,633) = 95.06,<br><b>p &lt; 0.001, R = 0.36</b>  | F(1,490) = 86.07,<br><b>p &lt; 0.001, R = 0.39</b>  |
|        | VMAT           | F(1,276) = 34.70,<br><b>p &lt; 0.001, R = 0.33</b> | F(1,633) = 312.76,<br><b>p &lt; 0.001, R = 0.58</b> | F(1,490) = 163.51,<br><b>p &lt; 0.001, R = 0.50</b> |
|        | DAT/VMAT ratio | F(1,276) = 0.94,<br>p = 0.333, R = 0.06            | F(1,633) = 3.62,<br>p = 0.06, R = 0.08              | F(1,490) = 17.89,<br><b>p &lt; 0.001, R = 0.19</b>  |
| dtSN   | DAT            | F(1,159) = 0.38,<br>p = 0.537, R = 0.05            | F(1,315) = 69.76,<br><b>p &lt; 0.001, R = 0.43</b>  | F(1,217) = 89.71,<br><b>p &lt; 0.001, R = 0.54</b>  |
|        | VMAT           | F(1,159) = 0.62,<br>p = 0.434, R = 0.06            | F(1,315) = 145.56,<br><b>p &lt; 0.001, R = 0.56</b> | F(1,217) = 48.44,<br><b>p &lt; 0.001, R = 0.43</b>  |
|        | DAT/VMAT ratio | F(1,159) = 0.02,<br>p = 0.894, R = 0.01            | F(1,315) = 4.67,<br><b>p = 0.031, R = 0.12</b>      | F(1,217) = 31.32,<br><b>p &lt; 0.001, R = 0.36</b>  |
| VTA    | DAT            | F(1,177) = 6.26,<br><b>p = 0.013, R = 0.19</b>     | F(1,420) = 63.93,<br><b>p &lt; 0.001, R = 0.36</b>  | F(1,337) = 152.79,<br><b>p &lt; 0.001, R = 0.56</b> |
|        | VMAT           | F(1,177) = 17.67,<br><b>p &lt; 0.001, R = 0.30</b> | F(1,420) = 235.22,<br><b>p &lt; 0.001, R = 0.60</b> | F(1,337) = 210.59,<br><b>p &lt; 0.001, R = 0.62</b> |
|        | DAT/VMAT ratio | F(1,177) = 0.24,<br>p = 0.627, R = 0.04            | F(1,420) = 1.75,<br>p = 0.186, R = 0.06             | F(1,337) = 54.00,<br><b>p &lt; 0.001, R = 0.37</b>  |
